# Supplementary material for: Growth and decay of the Iceland Ice Sheet through the last glacial cycle
Source: Copernicus journal article supplement (doi:10.5194/egusphere-2025-5319), 2025-11-10
Supplement: Supplementary file 1 [file Iceland.ICEdat.PaleoH.v7.xlsx]

## Sheet: Disclaimer and notes
WORKSHEETNAME	WORKSHEETDESCRIPTION
PaleoH	Main worksheet containing data for each site
COLUMN HEADING	DESCRIPTION	UNITS (if applicable)
SITID	Site identifier
LON	Longitude	decimal degrees
LAT	Latitude	decimal degrees
AUC	Uncorrected age	yr
AUCU	Uncorrected age uncertainty	yr
AGE	Age	yr
AGEU	Age uncertainty	yr
ELV	Elevation of sample	m
ELVU	Elevation uncertainty	m
ISO	Inference based on which isotope
COMMENTS	Additional information
TIERS	Criteria-based curation and the resultant quality tier assignment
REF1	First reference
REF2	Second reference
NOTES	Notes about calibration process

## Sheet: PaleoH
SITID	LON	LAT	AUC	AUCU	AGE	AGEU	AGEUMN	AGEUMX	ELV	ELVU	ISO	TIERS	COMMENTS	REF1	REF2	NOTE
1001	-14.3383	65.4614			12121	114	12007	12235	30	5	Greenl. ice chron.	4	Úthérað, E-Iceland. Vedde Ash constrains YD ice margin	Norðdahl et al (2019)	Benediktsson et al. 2022 and 2023 (book chapters in European Glacial Landscapes)
1002	-14.9817	65.6617	10134	106	11017	333	10656	11321	50	10	C14	1	Vopnafjörður, shells in marine sediments, mean of 5 samples. YD margin outside the coast, Preboreal margin invalley.	Sæmundsson (1995)	Benediktsson et al. 2022 and 2023 (book chapters in European Glacial Landscapes)	recalibrited by Ivar 2022 using CALIB 8.2 with the MARINE20 calibration curve (Heaton et al., 2020).
1003	-16.3363	66.1159			20400	13200	7200	33600	527	10	3He	4	Sandfell - Cosmogenic exposure dating of paleo ice thickness (mean of several samples)	Licciardi et al. (2006)	Licciardi et al. (2007)	recalibrated by Joe Licciardi 2024 using Greg Balco’s updated 3He exposure age calculator (Balco et al., 2008).
1004	-16.3458	66.0502			11200	4400	6800	15600	521	10	3He	1	Hafrafell - Cosmogenic exposure dating of paleo ice thickness (mean of several samples)	Licciardi et al. (2006)	Licciardi et al. (2007)	recalibrated by Joe Licciardi 2024 using Greg Balco’s updated 3He exposure age calculator (Balco et al., 2008).
1005	-16.3502	65.1791			10400	1000	9400	11400	1522	10	3He	1	Herðubreið - Cosmogenic exposure dating of paleo ice thickness (mean of several samples)	Licciardi et al. (2006)	Licciardi et al. (2007)	recalibrated by Joe Licciardi 2024 using Greg Balco’s updated 3He exposure age calculator (Balco et al., 2008).
1006	-16.4723	66.3525			14400	800	13600	15200	280	10	3He	1	Snartarstaðarnúpur - Cosmogenic exposure dating of paleo ice thickness (mean of several samples)	Licciardi et al. (2006)	Licciardi et al. (2007)	recalibrated by Joe Licciardi 2024 using Greg Balco’s updated 3He exposure age calculator (Balco et al., 2008).
1007	-16.5044	66.3478	13020	90	14712	387	14298	15072	40	10	C14	1	Hvalvík. Shell samples at c. 40 m, ML shoreline at 50-60 m a.s.l. Marine conditions.	Pétursson (1991); Norðdahl and Pétursson (2005)	Benediktsson et al. 2022 and 2023 (book chapters in European Glacial Landscapes)	recalibrited by Ivar 2022 using CALIB 8.2 with the MARINE20 calibration curve (Heaton et al., 2020).
1008	-16.6462	65.5496			10800	600	10200	11400	949	10	3He	1	Búrfell - Cosmogenic exposure dating of paleo ice thickness (mean of several samples)	Licciardi et al. (2006)	Licciardi et al. (2007)	recalibrated by Joe Licciardi 2024 using Greg Balco’s updated 3He exposure age calculator (Balco et al., 2008).
1009	-16.8623	65.4535			14300	800	13500	15100	1087	10	3He	1	Bláfjall - Cosmogenic exposure dating of paleo ice thickness (mean of several samples)	Licciardi et al. (2006)	Licciardi et al. (2007)	recalibrated by Joe Licciardi 2024 using Greg Balco’s updated 3He exposure age calculator (Balco et al., 2008).
1010	-16.8846	65.7854			14400	2000	12400	16400	767	10	3He	1	Gæsafjöll - Cosmogenic exposure dating of paleo ice thickness (mean of several samples)	Licciardi et al. (2006)	Licciardi et al. (2007)	recalibrated by Joe Licciardi 2024 using Greg Balco’s updated 3He exposure age calculator (Balco et al., 2008).
1011	-17.9011	65.8261			12121	114	12007	12235	190	10	Greenl. ice chron.	4	Fnjóskadalur, N-Iceland. Vedde Ash constrains YD ice margin	Norðdahl and Hafliðason (1992)	Benediktsson et al. 2022 and 2023 (book chapters in European Glacial Landscapes)
1012	-19.5175	65.9631			11900	900	11000	12800	162	0	36Cl	2	Cosmogenic exposure dating of YD ice margin	Andrés et al (2018)	Benediktsson et al. 2022 and 2023 (book chapters in European Glacial Landscapes)
1013	-19.9383	65.9581			12700	900	11800	13600	138	0	36Cl	2	Cosmogenic exposure dating of YD ice margin	Andrés et al (2018)	Benediktsson et al. 2022 and 2023 (book chapters in European Glacial Landscapes)
1014	-20.2403	64.015	10170	134	11066	430	10633	11492	70	10	C14	1	Age of inner Búði moraine, S-Iceland (marine shells, mean of 7 samples). Outer Búði moraine is of YD age.	Hjartarson and Ingólfsson (1988), Geirsdóttir et al (1997), Norðdahl and Pétursson (2005).	Benediktsson et al. 2022 and 2023 (book chapters in European Glacial Landscapes)	recalibrited by Ivar 2022 using CALIB 8.2 with the MARINE20 calibration curve (Heaton et al., 2020).
1015	-20.3828	66.0614	10550	240	12362	657	11681	12994	52	10	C14	1	Torfdalsvatn lake sediments (no marine influence). ML shorelines at 65 m a.s.l. indicate high RSL during Bølling-Allerød.	Björck et al (1992), Rundgren et al. (1997)	Benediktsson et al. 2022 and 2023 (book chapters in European Glacial Landscapes)	recalibrited by Ivar 2022 using CALIB 8.2 with the MARINE20 calibration curve (Heaton et al., 2020).
1016	-20.4997	64.3578			10100	600	9500	10700	1013	10	3He	1	Högnhöfði - Cosmogenic exposure dating of paleo ice thickness (mean of several samples)	Licciardi et al. (2006)	Licciardi et al. (2007)	recalibrated by Joe Licciardi 2024 using Greg Balco’s updated 3He exposure age calculator (Balco et al., 2008).
1017	-20.5366	64.4177			10700	2400	8300	13100	1157	10	3He	1	Hlöðufell - Cosmogenic exposure dating of paleo ice thickness (mean of several samples)	Licciardi et al. (2006)	Licciardi et al. (2007)	recalibrated by Joe Licciardi 2024 using Greg Balco’s updated 3He exposure age calculator (Balco et al., 2008).
1018	-20.5795	64.3243			12100	400	11700	12500	924	10	3He	1	Rauðafell - Cosmogenic exposure dating of paleo ice thickness (mean of several samples)	Licciardi et al. (2006)	Licciardi et al. (2007)	recalibrated by Joe Licciardi 2024 using Greg Balco’s updated 3He exposure age calculator (Balco et al., 2008).
1019	-20.6792	64.0117			12121	114	12007	12235	48	0	Greenl. ice chron.	4	Vedde Ash in Lake Hestvatn, S-Iceland, places YD ice margin in the lake basin.	Geirsdóttir et al. (2021)	Benediktsson et al. 2022 and 2023 (book chapters in European Glacial Landscapes)
1020	-20.6831	64.3547			10400	400	10000	10800	995	10	3He	1	Skriða - Cosmogenic exposure dating of paleo ice thickness (mean of several samples)	Licciardi et al. (2006)	Licciardi et al. (2007)	recalibrated by Joe Licciardi 2024 using Greg Balco’s updated 3He exposure age calculator (Balco et al., 2008).
1021	-21.2003	64.387			12600	800	11800	13400	779	10	3He	1	Hvalfell - Cosmogenic exposure dating of paleo ice thickness (mean of several samples)	Licciardi et al. (2006)	Licciardi et al. (2007)	recalibrated by Joe Licciardi 2024 using Greg Balco’s updated 3He exposure age calculator (Balco et al., 2008).
1022	-21.5226	63.9412			11400	1400	10000	12800	510	10	3He	1	Geitafell - Cosmogenic exposure dating of paleo ice thickness (mean of several samples)	Licciardi et al. (2006)	Licciardi et al. (2007)	recalibrated by Joe Licciardi 2024 using Greg Balco’s updated 3He exposure age calculator (Balco et al., 2008).
1023	-21.6717	64.1739	10680	100	11812	406	11396	12207	60	2	C14	1	Dated Helgafellsmelar ML shoreline	Ingólfsson et al. (1995)	Benediktsson et al. 2022 and 2023 (book chapters in European Glacial Landscapes)	recalibrited by Ivar 2022 using CALIB 8.2 with the MARINE20 calibration curve (Heaton et al., 2020).
1024	-21.6931	64.5233	12927	95	14560	402	14145	14948	123	0	C14	1	Stóri-Sandhóll, barnacles at 112 and 135 m a.s.l., age is mean of two samples. Marine conditions. ML shoreline at 150 m a.s.l.	Magnúsdóttir and Norðdahl (2000), Norðdahl and Ingólfsson (2001)	Benediktsson et al. 2022 and 2023 (book chapters in European Glacial Landscapes)	recalibrited by Ivar 2022 using CALIB 8.2 with the MARINE20 calibration curve (Heaton et al., 2020).
1025	-21.8383	64.3625	12940	80	14585	373	14198	14943	80	0	C14	1	Stóra-Fellsöxl, whalebone. Marine conditions. ML shoreline at 105 m a.s.l.		Benediktsson et al. 2022 and 2023 (book chapters in European Glacial Landscapes)	recalibrited by Ivar 2022 using CALIB 8.2 with the MARINE20 calibration curve (Heaton et al., 2020).
1026	-21.9206	64.1208	11070	35	12411	213	12176	12602	2	1	C14	4	Fossvogur Bay. Mean of 30 samples. Tidewater glacier expansion during Younger Dryas.	Sveinbjörnsdóttir et al (1993), Geirsdóttir and Eiríksson (1994), Norðdahl and Pétursson (2005)	Benediktsson et al. 2022 and 2023 (book chapters in European Glacial Landscapes)	recalibrited by Ivar 2022 using CALIB 8.2 with the MARINE20 calibration curve (Heaton et al., 2020).
1027	-22.0231	64.3944	11535	55	12838	171	12688	13030	20	5	C14	4	Maximum age of terminal moraine complex (YD advance into marine sediments). Shell samples from the Melabakkar-Ásbakkar coastal sections.	Sigfúsdóttir and Benediktsson (2020)	Benediktsson et al. 2022 and 2023 (book chapters in European Glacial Landscapes)	recalibrited by Ivar 2022 using CALIB 8.2 with the MARINE20 calibration curve (Heaton et al., 2020).
1028	-22.0261	64.1536	28374	312	31577	754	30969	32477	1	1	C14	1	Seltjarnarnes, mean of two samples	Eiríksson et al. (1997)	Benediktsson et al. 2022 and 2023 (book chapters in European Glacial Landscapes)	recalibrited by Ivar 2022 using CALIB 8.2 with the MARINE20 calibration curve (Heaton et al., 2020).
1029	-22.4797	63.9233	35100	1400	38945	2697	36053	41447	20	5	C14	1	Rauðamelur. ice did not extend onto the southwestern shelf during the latter part of MIS 3	Norðdahl and Sæmundsson (1999), Norðdahl and Pétursson (2005)	Benediktsson et al. 2022 and 2023 (book chapters in European Glacial Landscapes)	recalibrited by Ivar 2022 using CALIB 8.2 with the MARINE20 calibration curve (Heaton et al., 2020).
1030	-22.5517	63.9631	21833	101	25201	333	24888	25554	19	0	C14	4	Njarðvíkurheiði shallow marine deposits, ice free	Jóhannesson et al. (1997); Norðdahl and Pétursson 2005	Benediktsson et al. 2022 and 2023 (book chapters in European Glacial Landscapes)	recalibrited by Ivar 2022 using CALIB 8.2 with the MARINE20 calibration curve (Heaton et al., 2020).
