# Supplementary material for: Growth and decay of the Iceland Ice Sheet through the last glacial cycle
Source: Copernicus journal article supplement (doi:10.5194/egusphere-2025-5319), 2025-11-10
Supplement: Supplementary file 3 [file IcelandICEdat.PaleoExt.v7.xlsx]

## Sheet: Disclaimer and notes
WORKSHEETNAME	WORKSHEETDESCRIPTION	Var3
PaleoExt	Main worksheet containing data for each site
COLUMN HEADING	DESCRIPTION	UNITS (if applicable)
SITID	Site identifier
LON	Longitude	decimal degrees
LAT	Latitude	decimal degrees
ELV	Elevation
FACINT	Facies interpretation from source publication
CLASS	Classification of facies – OMC(open marine condition)=1; SIS(sub ice-shelf) =2; PGL(proximal grounding line)=3;
AUC	Uncorrected 14C age	14C yr
AUCU	Uncorrected 14C age uncertainty	14C yr
MCF +- MCFU	Marine correction factor (=deltaR) +/- Marine correction factor uncertainty (=detlaR_error). CALIB has a default global marine correction factor of 550 yr so local factor must be reduced accordingly. This is done during processing	yr
Ref_MCF	Reference for Marine correction factor
AGE	Calibrated age	cal yr BP
AGEU	Calibrated age uncertainty
AGE1UMN	Calibrated age min 1 sigma uncertainty	cal yr BP
AGE1UMX	Calibrated age max 1 sigma uncertainty	cal yr BP
AGE2UMN	Calibrated age min 2 sigma uncertainty	cal yr BP
AGE2UMX	Calibrated age max 2 sigma uncertainty	cal yr BP
TIERS	Criteria-based curation and the resultant quality tier assignment
COMMENTS	Additional information
REF1	First reference
REF2	Second reference
NOTES	Notes about calibration process

## Sheet: PaleoExt
SITID	LON	LAT	ELV	FACINT	CLASS	AUC	AUCU	AGEmed	AGE	AGEU	AGE1UMN	AGE1UMX	AGE2UMN	AGE2UMX	TIERS	MCF +/- MCFU	Ref_MCF	COMMENTS	REF1	REF2	NOTES
2001	-19.1083	66.9381	-450	PGL	3	42600	3050	45053	45975	5868	43041	48909	40107	51843	1	24.0 +/- 23.0	Håkansson 1983	Ice culminating before 28 cal ka BP and persisted until 15 cal ka BP. Mixed benthic and planktic forams c. 1 m within massive matrix supported diamicton.	Andrews et al (2000)	Benediktsson et al. 2022 and 2023 (book chapters in European Glacial Landscapes)	recalibrited by Ivar 2022 using CALIB 8.2 with the MARINE20 calibration curve (Heaton et al., 2020).
2002	-20.2272	66.8464	-406	PGL	3	25330	640	28649	28663	1266	28030	29296	27397	29929	1A	24.0 +/- 23.1	Håkansson 1983	Ice culminating before 28 cal ka BP and persisted until 15 cal ka BP	Andrews et al (2000)	Benediktsson et al. 2022 and 2023 (book chapters in European Glacial Landscapes)	recalibrited by Ivar 2022 using CALIB 8.2 with the MARINE20 calibration curve (Heaton et al., 2020).
2003	-20.2344	66.855	-390	PGL	3	13440	190	15032	15032	568	14206	15788	13524	16510	1	221.0 +/- 525.0	Skinner et al (2019), Waelbroeck et al (2019)	In the Reykjafjardarall-Húnafloadjup trough to the northeast of the West Fjords (Fig. 55.1), matrix-supported dia- mict overlain by postglacial muds is reported from three marine sediment cores (Andrews et al., 2000; Andrews and Helgadottir, 2003). The diamicton contains consistently old foraminifera (28.6-45.0cal ka BP; Table 55.1, 4-5) whereas the overlying mud is dated to ,15.3 cal ka BP (Tabl…	Andrews and Helgadóttir 2003	Benediktsson et al. 2022 and 2023 (book chapters in European Glacial Landscapes)	recalibrited by Alexis 2025 using CALIB 8.2 with the MARINE20 calibration curve (Heaton et al., 2020).
2004	-23.9683	66.5842	-222	SIS	2	19280	420	22329	22286	1009	21781	22790	21277	23294	1A	24.0 +/- 23.0	Håkansson 1983	Sample located within rhythmic laminations above diamict. Material unreported. Glacier ice absent but possibly shorefast sea ice	Andrews et al (2002), Geirsdóttir et al (2002)	Benediktsson et al. 2022 and 2023 (book chapters in European Glacial Landscapes)	recalibrited by Ivar 2022 using CALIB 8.2 with the MARINE20 calibration curve (Heaton et al., 2020).
2005	-23.9683	66.5842	-222	SIS	2	34600	640	36600	36521	1481	35780	37261	35040	38001	1A	24.0 +/- 23.1	Håkansson 1983	glacier ice was absent on the Northwest Iceland shelf by c. 36 cal ka BP but present in the fjords and highlands of the West Fjords Peninsula until 9-10 cal ka BP	Andrews et al (2002), Geirsdóttir et al (2002)	Benediktsson et al. 2022 and 2023 (book chapters in European Glacial Landscapes)	calibrated by Andrews et al (2002) by adding a 2000 year correction
2006	-24.2117	64.285	-246	PGL	3	13465	290	15338	15285	874	14848	15722	13411	17159	1	24.0 +/- 23.2	Håkansson 1983	Extrapolated date of ice-contact sediments. Maximum age of deglaciation from the western shelf	Jennings et al (2000)	Benediktsson et al. 2022 and 2023 (book chapters in European Glacial Landscapes)	recalibrited by Ivar 2022 using CALIB 8.2 with the MARINE20 calibration curve (Heaton et al., 2020).
2007	-27.5339	65.1192	-481	PGL	3	18165	80	20990	21014	320	20854	21173	20694	30000	3	24.0 +/- 23.3	Håkansson 1983	Mean of two samples. These dates may imply that the IIS stood at the moraine during the LGM but it cannot be excluded that the moraine is older	Andrews et al (2000)	Benediktsson et al. 2022 and 2023 (book chapters in European Glacial Landscapes)	recalibrited by Ivar 2022 using CALIB 8.2 with the MARINE20 calibration curve (Heaton et al., 2020).
																		Marine ages are reservoir corrected by ∆R 24±23. Supported by Håkansson's (1983) results of a reservoir age around Iceland of 365±20 14C years: Håkansson, S., 1983. A reservoir age for the coastal waters of Iceland. Geologiska Föreningens i Stockholm Förhandlingar 105, 65-68. https://www.tandfonline.com/doi/abs/10.1080/11035898309455300
